# Supplementary material
Source: publisher figshare collection journal article supplement (https://acs.figshare.com/ndownloader/files/23087954)
Supplement: Supplementary file 1 [file 23087954]

# Supporting Information

## Hyaluronic Acid-Modified Au-Ag Alloy Nanoparticles for Radiation/Nanozyme/Ag<sup>+</sup> Multimodal Synergistically Enhanced Cancer Therapy

*Yu Chong,<sup>†,‡</sup> Jie Huang,<sup>\*,‡</sup> Xiaoyu Xu,<sup>‡</sup> Chenggong Yu,<sup>‡</sup> Xingyu Ning,<sup>‡</sup> Saijun Fan,<sup>⊥</sup> Zhijun Zhang<sup>\*,‡</sup>*

<sup>†</sup>State Key Laboratory of Radiation Medicine and Protection, School for Radiological and interdisciplinary Sciences (RAD-X) and Collaborative Innovation Center of Radiation Medicine of Jiangsu Higher Education Institutions, Soochow University, Suzhou, 215123, China.

<sup>‡</sup>CAS Key Laboratory of Nano-Bio Interface, Division of Nanobiomedicine, Suzhou Institute of Nano-Tech and Nano-Bionics, Chinese Academy of Sciences, Suzhou, 215123, China.

<sup>⊥</sup> Tianjin Key Laboratory of Radiation Medicine and Molecular Nuclear Medicine, Institute of Radiation Medicine, Chinese Academy of Medical Science/Peking Union Medical College, Tianjin, 300192, China

\*Corresponding authors.

Email: [jhuang2008@sinano.ac.cn](mailto:jhuang2008@sinano.ac.cn); [zjzhang2007@sinano.ac.cn](mailto:zjzhang2007@sinano.ac.cn)

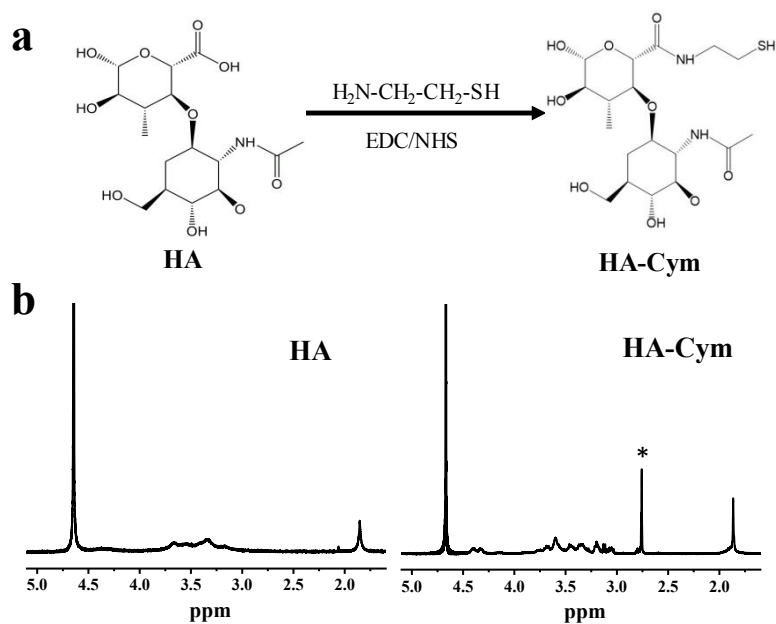

**Figure S1.** Synthesis and characterization of HA-Cym Conjugates. (a) Formation of HA-Cym conjugates by covalent modification of Cym onto the carboxyl groups of HA *via* amide bonds. (b)  $^1\text{H}$  NMR spectra of HA and HA-Cym conjugates. Resonance peak at 2.76 ppm marked \* was assigned to the methylene protons on  $-\text{CH}_2\text{SH}$  of Cym.

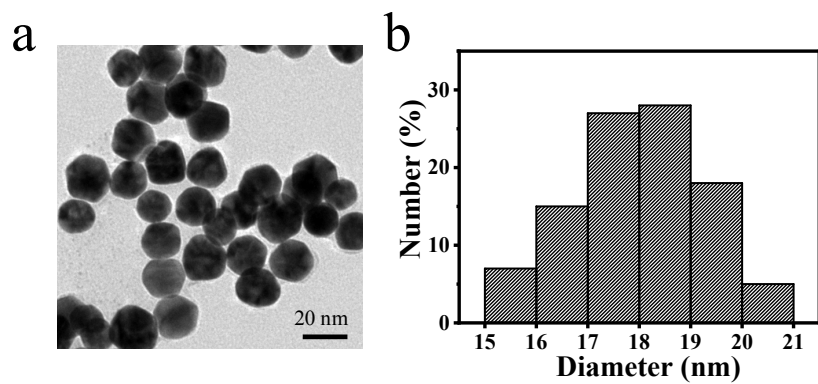

**Figure S2.** (a) TEM image of Au@HA NPs. (b) Diameter distribution of Au@HA NPs based on the TEM image in (a).

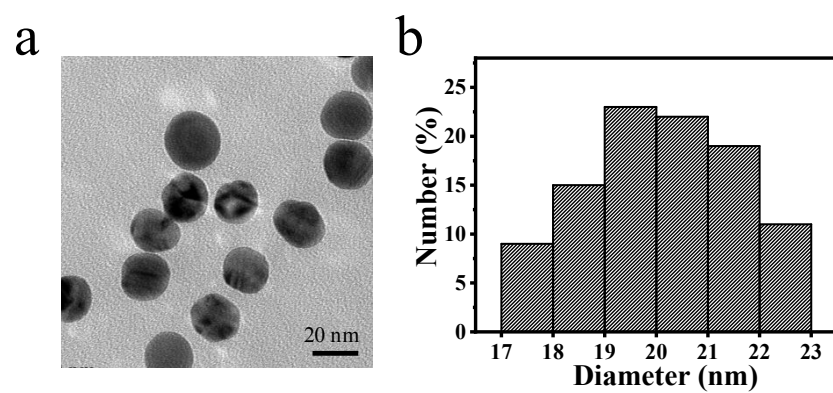

**Figure S3.** (a) TEM image of Ag@HA NPs. (b) Diameter distribution of Ag@HA NPs based on the TEM image in (a).

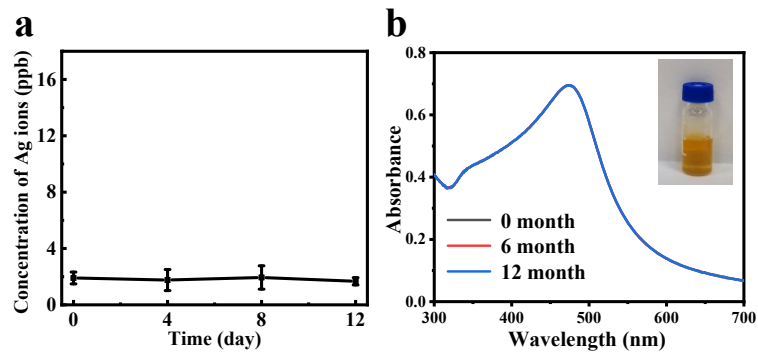

**Figure S4.** Stability of Au-Ag@HA NPs. (a) Concentration of free Ag<sup>+</sup> in PBS (pH=7.4) of Au-Ag@HA NPs in 12 days determined by ICP-MS, n=3. (b) The UV-vis absorption spectrum for Au-Ag@HA NPs stored at room temperature for 1 year, and a photograph of Au-Ag@HA NPs aqueous solution is shown as inset.

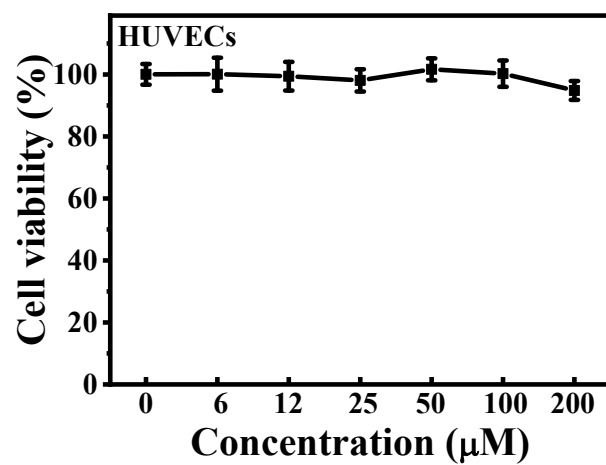

**Figure S5.** Relative viability of HUVEC cells incubated with Au-Ag@HA NPs at different concentrations for 24 h (n=3).

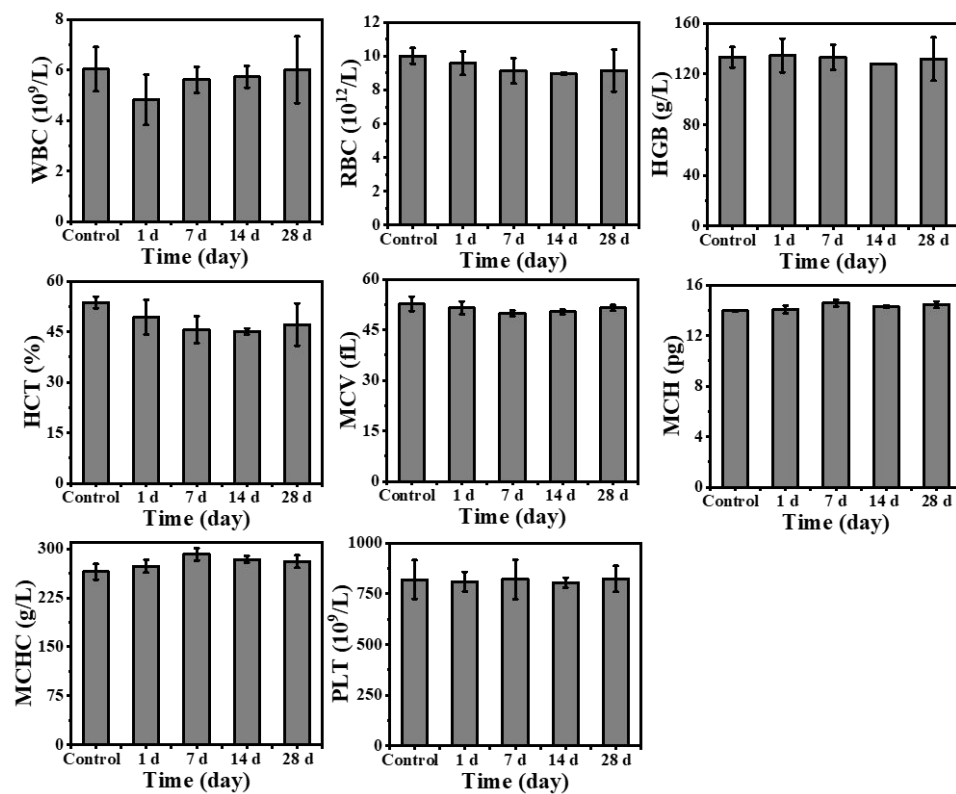

**Figure S6.** Blood routine analysis for the mice treated with Au-Ag@HA NPs at different time points. Mean values and error bars are defined as mean and standard deviation, n = 5.

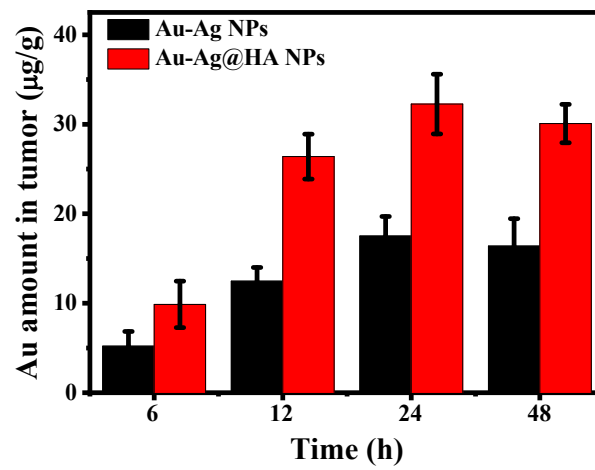

**Figure S7.** The content of Au element in the tumors from the mice bearing 4T1 tumors after intravenous injection of Au-Ag@HA NPs or Au-Ag NPs for different periods of time. Values represent means  $\pm$  standard error,  $n=3$ .



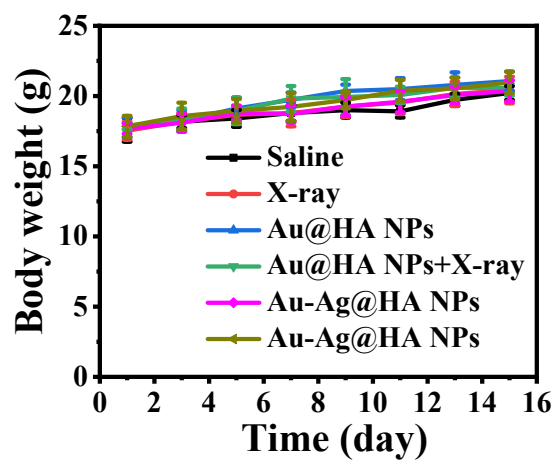

**Figure S8.** Body weight fluctuation of the mice bearing 4T1 tumors after different treatments: saline alone, saline plus X-ray, Au@HA NPs (10 mg kg<sup>-1</sup>) alone, Au@HA NPs (10 mg kg<sup>-1</sup>) plus X-ray, Au-Ag@HA NPs (10 mg kg<sup>-1</sup>) alone and Au-Ag@HA NPs (10 mg kg<sup>-1</sup>) plus X-ray.

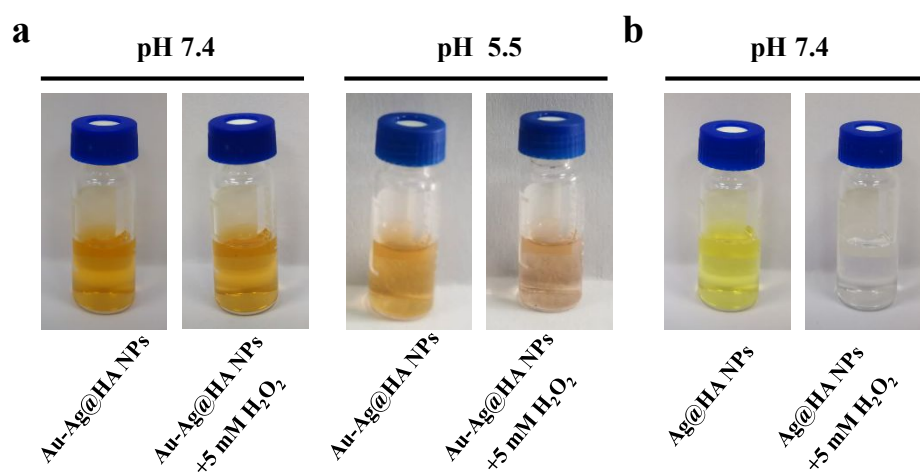

**Figure S9.** (a) Photographs of Au-Ag@HA NPs with or without 5 mM H<sub>2</sub>O<sub>2</sub> at either acidic or neutral solution after 30 min incubation. (b) Photographs of Ag@HA NPs with or without 5 mM H<sub>2</sub>O<sub>2</sub> under neutral condition after 30 min incubation.

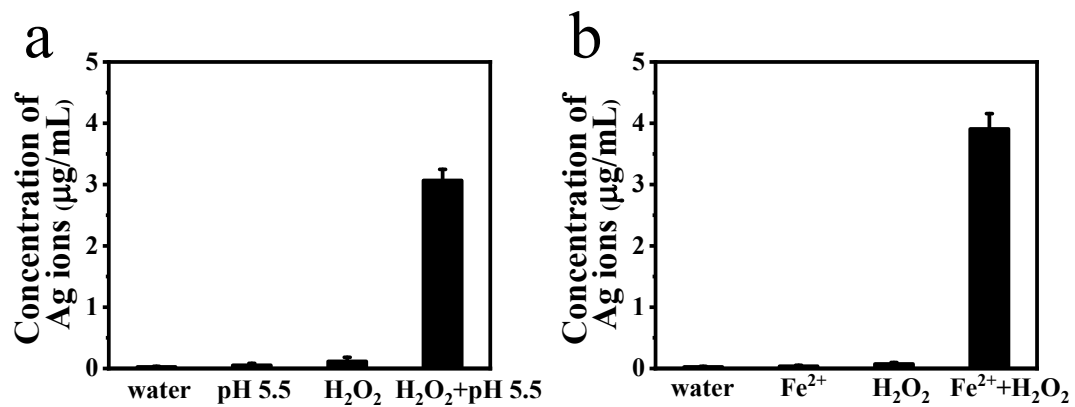

**Figure S10.** (a) The release of Ag<sup>+</sup> from Au-Ag@HA NPs in the presence of H<sub>2</sub>O<sub>2</sub> (5 mM) at pH 5.5 for 30 min. (b) The release of Ag<sup>+</sup> by •OH generated from Fenton reaction (FeCl<sub>2</sub> (25 μM) and H<sub>2</sub>O<sub>2</sub> (25 μM)) for 10 min.
